# 1 Frequent first-trimester pregnancy loss in rhesus macaques in- 2 fected with African-lineage Zika virus

3 Jenna R. Rosinski<sup>1&</sup>, Lauren E. Raasch<sup>1&</sup>, Patrick Barros Tiburcio<sup>1</sup>, Meghan E. Breitbart<sup>1</sup>,  
4 Phoenix M. Shepherd<sup>1</sup>, Keisuke Yamamoto<sup>1</sup>, Elaina Razo<sup>2</sup>, Nicholas P. Krabbe<sup>2</sup>, Mason I.  
5 Bliss<sup>3</sup>, Alexander D. Richardson<sup>3</sup>, Morgan A. Einwalter<sup>3</sup>, Andrea M. Weiler<sup>3</sup>, Emily L. Sneed<sup>3</sup>,  
6 Kerri B. Fuchs<sup>3</sup>, Xiankun Zeng<sup>4</sup>, Kevin K. Noguchi<sup>5</sup>, Terry K. Morgan<sup>6,7</sup>, Alexandra J. Alberts<sup>1</sup>,  
7 Kathleen M. Antony<sup>8</sup>, Sabrina Kabakov<sup>9</sup>, Karla K. Ausderau<sup>9,10</sup>, Ellie K. Bohm<sup>11</sup>, Julia C.  
8 Pritchard<sup>11</sup>, Rachel V. Spanton<sup>9</sup>, James N. Ver Hoove<sup>12</sup>, Charlene B. Y. Kim<sup>12</sup>, T. Michael Nork<sup>12</sup>,  
9 Alex W. Katz<sup>12</sup>, Carol A. Rasmussen<sup>12</sup>, Amy Hartman<sup>13</sup>, Andres Mejia<sup>3</sup>, Puja Basu<sup>3</sup>, Heather  
10 A. Simmons<sup>3</sup>, Jens C. Eickhoff<sup>14</sup>, Thomas C. Friedrich<sup>15</sup>, Matthew T. Aliota<sup>11</sup>, Emma L. Mohr<sup>2</sup>,  
11 Dawn M. Dudley<sup>1</sup>, David H. O'Connor<sup>1,3&</sup>, Christina M. Newman<sup>1&\*</sup>.

12 \*Corresponding author

13 Email: ccondon2@wisc.edu

14 &Authors contributed equally to the manuscript

15 <sup>1</sup>Department of Pathology and Laboratory Medicine, University of Wisconsin-Madison,  
16 Wisconsin, USA, <sup>2</sup>Department of Pediatrics, University of Wisconsin-Madison, Wisconsin,  
17 USA, <sup>3</sup>Wisconsin National Primate Research Center, University of Wisconsin-Madison,  
18 Wisconsin, USA, <sup>4</sup>United States Army Medical Research Institute of Infectious Diseases,,  
19 Maryland, USA, <sup>5</sup>Department of Psychiatry, Washington University School of Medicine,  
20 Missouri, USA, <sup>6</sup>Department of Pathology, Oregon Health and Science University, Oregon,  
21 USA, <sup>7</sup>Department of Obstetrics and Gynecology, Oregon Health and Science University,  
22 Oregon, USA, <sup>8</sup>Department of Obstetrics and Gynecology, University of Wisconsin-Madison,  
23 Wisconsin, USA, <sup>9</sup>Department of Kinesiology, University of Wisconsin-Madison, Wisconsin,  
24 USA, <sup>10</sup>Waisman Center, University of Wisconsin-Madison, Wisconsin, USA, <sup>11</sup>Department of  
25 Veterinary and Biomedical Science, University of Minnesota, Minnesota, USA, <sup>12</sup>Department  
26 of Ophthalmology and Visual Sciences, University of Wisconsin-Madison, Wisconsin,  
27 USA, <sup>13</sup>Department of Communication Sciences and Disorders, University of Wisconsin-  
28 Madison, Wisconsin, USA <sup>14</sup>Department of Biostatistics & Medical Informatics, University of  
29 Wisconsin-Madison, Wisconsin, USA, <sup>15</sup>Department of Pathobiological Sciences, University of  
30 Wisconsin-Madison, Wisconsin, USA

## 31 **Abstract**

32 In the 2016 Zika virus (ZIKV) pandemic, a previously unrecognized risk of birth defects sur-  
33 faced in babies whose mothers were infected with Asian-lineage ZIKV during pregnancy. Less  
34 is known about the impacts of gestational African-lineage ZIKV infections. Given high human  
35 immunodeficiency virus (HIV) burdens in regions where African-lineage ZIKV circulates, we  
36 evaluated whether pregnant rhesus macaques infected with simian immunodeficiency vi-  
37 rus (SIV) have a higher risk of African-lineage ZIKV-associated birth defects. Remarkably, in  
38 both SIV+ and SIV- animals, ZIKV infection early in the first trimester caused a high incidence  
39 (78%) of spontaneous pregnancy loss within 20 days. These findings suggest a significant risk  
40 for early pregnancy loss associated with African-lineage ZIKV infection and provide the first  
41 consistent ZIKV-associated phenotype in macaques for testing medical countermeasures.

## 42 **Body Text**

43 Zika virus (ZIKV) is a flavivirus discovered in 1947 in Uganda<sup>1</sup>. ZIKV was historically associat-  
44 ed with intermittent epidemics throughout Africa, Asia, and Oceania, resulting in mild illness  
45 with seemingly few consequences. When the virus emerged in Brazil in 2015, there was an  
46 increase in cases of infant microcephaly<sup>2</sup>. This increase in microcephaly and other develop-  
47 mental abnormalities among neonates was ultimately associated with ZIKV exposure in-utero,  
48 drawing the attention of the broader scientific community to congenital Zika syndrome (CZS)<sup>3-</sup>  
49 <sup>5</sup>. In the United States, 5-10% of infants with known gestational ZIKV exposure have devel-  
50 opmental outcomes consistent with CZS<sup>6</sup>. Although the public health emergency has ended,  
51 recent outbreaks in India and evidence of periodic human infections elsewhere suggest ZIKV  
52 remains a threat during pregnancy<sup>7-10</sup>.

53 Macaques have been used to model ZIKV infection during pregnancy using varying gestation-  
54 al time points, strains, doses, and routes of infection. Due to interest in the 2016 ZIKV pan-  
55 demic, most studies have used Asian-lineage viruses, and in these studies, infection earlier in  
56 gestation frequently led to more severe outcomes<sup>11-13</sup>. Previously, we found a fetal demise rate  
57 of 26% (n=50) when using an Asian-lineage strain (PRVABC59) to infect macaques during the  
58 first trimester (<GD 55)<sup>14</sup>. Across multiple more recent studies using this strain, adverse fetal  
59 outcomes remain relatively rare (<10%; n=21) (Extended Data Table 1)<sup>12,13,15-17</sup>.

60 This study was designed to complement the NIH-supported International Prospective Cohort  
61 Study of HIV and Zika in Infants and Pregnancy (HIV ZIP)<sup>18</sup>. The goals of HIV ZIP are to deter-  
62 mine whether infection with HIV and treatment with antiretroviral therapy (ART) increases the  
63 risk for ZIKV infection in the fetus and assess the risk of fetal co-infection with HIV and ZIKV.  
64 Unlike human co-infections, macaques can be infected with the same dose, strain, and route  
65 of ZIKV and simian immunodeficiency virus (SIV)<sup>19</sup>. SIV-induced disease in macaques man-  
66 ifests similarly to HIV-induced disease in humans, making SIV-infected macaques a useful  
67 model for the study of human HIV infection<sup>20</sup>. Areas of high HIV prevalence in sub-Saharan  
68 Africa also overlap with areas of historical ZIKV infections<sup>21-23</sup>. Additionally, African-lineage  
69 ZIKV strains show greater pathogenicity in mice than Asian-lineage strains and resulted in re-  
70 sorption of all embryos in dams infected with African-lineage ZIKV<sup>24,25</sup>. Therefore, we used an  
71 African-lineage virus from Senegal (ZIKV-DAK; strain 41524) in this study. This is the only ZIKV  
72 strain in this study; hereafter it is referred to as ZIKV. When we previously infected macaques  
73 with a high dose (1x10<sup>8</sup> PFU) of this strain at gestational day (GD) 45, we observed a demise  
74 rate of 38% (n=8), whereas a physiological dose (1x10<sup>4</sup> PFU) resulted in no demise (n=4)<sup>26,27</sup>.

75 For this study, twenty-three rhesus macaques were enrolled into one of five Cohorts (Fig. 1).  
76 Information on the exact timing of infection, ART treatment, and pregnancy for all animals is in  
77 Extended Data Table 2. We reasoned that the impacts of SIV co-infection on ZIKV pathogen-  
78 esis would be most apparent when ZIKV infection occurs early in pregnancy, so we infected  
79 animals at approximately GD 30 (range GD 26-38) which corresponds to GD 49 in human  
80 pregnancy<sup>28</sup>. Cohort III was SIV naive and not treated with ART to control for the potential  
81 impacts of ART on ZIKV adverse outcomes. All SIV+ animals (Cohorts I and IV) reached a  
82 chronic set point before beginning ART and achieved undetectable SIV viremia before sub-  
83 sequent ZIKV/mock exposure (Extended Data Fig. 1A). All 14 ZIKV-exposed animals (Cohorts  
84 I-III) had detectable ZIKV in plasma by 3 days post inoculation (DPI) and reached peak plasma  
85 viremia between 4 DPI and 6 DPI (mean 4.7 DPI) (Extended Data Fig. 1B). Plasma viremia was  
86 resolved for all animals by 20 DPI except Animal I who had prolonged detection of ZIKV RNA

87 until 132 DPI; additional data are in Supplementary Table 1. All dams developed robust neu-  
 88 tralizing antibody responses to ZIKV by 28 DPI (Supplementary Fig. 1). In total, 11 of 14 (78%)  
 89 ZIKV+ dams experienced fetal demise in the first trimester (GD 38-54) (Fig. 1).

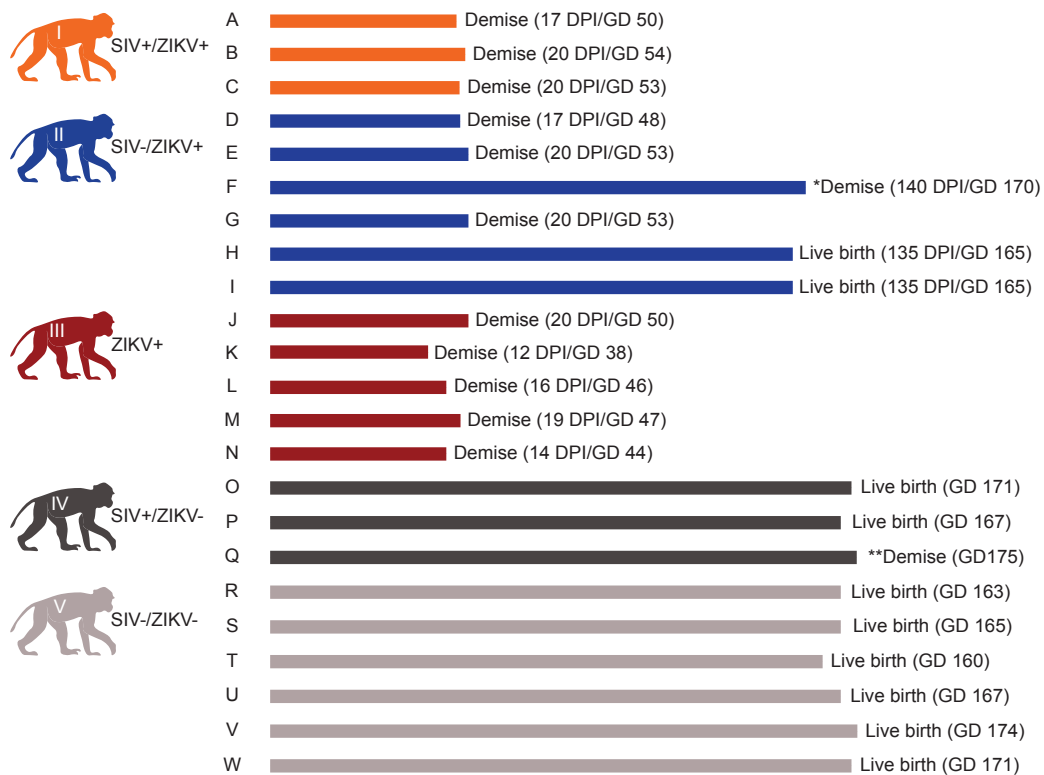

90  
 91 **Fig 1: Pregnancy outcomes.** \*Animal F and fetus died on the day of clinical C-section (GD 170) due to anesthesia  
 92 complications. \*\*The infant of Animal Q died 5 days after the due date (GD 175).

93 The timing of pregnancy loss was remarkably consistent: all occurred at 12-20 days post-  
 94 ZIKV exposure (Fig. 1, Extended Data Table 2). A Cohort II full term infant died from complica-  
 95 tions (cardiac and respiratory arrest) during clinical Cesarean section (C-section), during which  
 96 the dam also died (Pregnancy F). More details about this case are in Supplementary Table  
 97 2. All animals in the ZIKV naïve cohorts (Cohorts IV and V) maintained viable pregnancies  
 98 apart from the dam from Pregnancy Q, who experienced a full-term fetal loss around GD 175.  
 99 This falls within the pregnancy loss rates for non-ZIKV exposed macaques which range from  
 100 4-10.9%<sup>14</sup>. In-utero measurements and findings during ultrasounds were recorded and did  
 101 not identify a consistent phenotype in embryos/fetuses or maternal-fetal interface (MFI) tissue  
 102 preceding pregnancy loss (Supplementary Fig. 2, Supplementary Tables 3 and 4). Neonatal  
 103 developmental assessments were performed on surviving infants (Supplementary Figs. 3-9).  
 104 One of the two infants from Cohort II (Infant H) had lower developmental scores in visual  
 105 orientation, tracking, and focus tasks in the neonatal period, abnormal retinal function, and  
 106 a thicker retina compared with the other infants. This suggests that prenatal ZIKV exposure  
 107 may negatively impact visual pathways in some infants, though larger sample sizes of ZIKV-  
 108 exposed infants need to be studied to determine if this is a ZIKV-specific impact.

109 ZIKV was detected in the MFI tissue by reverse transcriptase quantitative polymerase chain  
 110 reaction (RT-qPCR) from all 11 dams that experienced early pregnancy loss and was present  
 111 in all three placental layers (decidua, placental parenchyma, chorionic plate) (Fig. 2A). *In situ*  
 112 hybridization (ISH) also detected ZIKV in the chorionic plate, chorionic villi, and surrounding

113 the chorionic vessels for all 11 cases; however, no RNA was detected in the decidua (Fig. 2B,  
 114 Supplementary Table 2). The ISH signal in MFI tissue was highly concentrated in the chori-  
 115 onic villi where ZIKV was restricted to the villous stroma and absent from the outer syncy-  
 116 tiotrophoblast layer (Fig. 2B, Supplementary Table 2). Histopathologic analysis of placentas  
 117 from ZIKV-exposed cohorts (Cohorts I-III) identified placental lesions, frequently in the pla-  
 118 cental parenchyma, in all cases of early pregnancy loss and one case of full-term infant loss  
 119 (Supplementary Table 2). However, this analysis was limited by the absence of gestational-age  
 120 matched tissues from ZIKV-naive dams. Nine of 11 dams (Pregnancies A, D, E, G, J, K, L, M,  
 121 N) across Cohorts I-III had ZIKV detected in a subset of maternal tissues by RT-qPCR (Fig.  
 122 2A). ZIKV was also detected in embryonic/fetal tissues and fluids from all cases of early preg-  
 123 nancy loss (Fig. 2C, Fig. 2D, Supplementary Table 2). Pregnancy F had no detectable ZIKV  
 124 RNA in MFI nor maternal tissues. MFI tissues from Pregnancies H and I were unable to be  
 125 collected because the dams gave birth naturally.

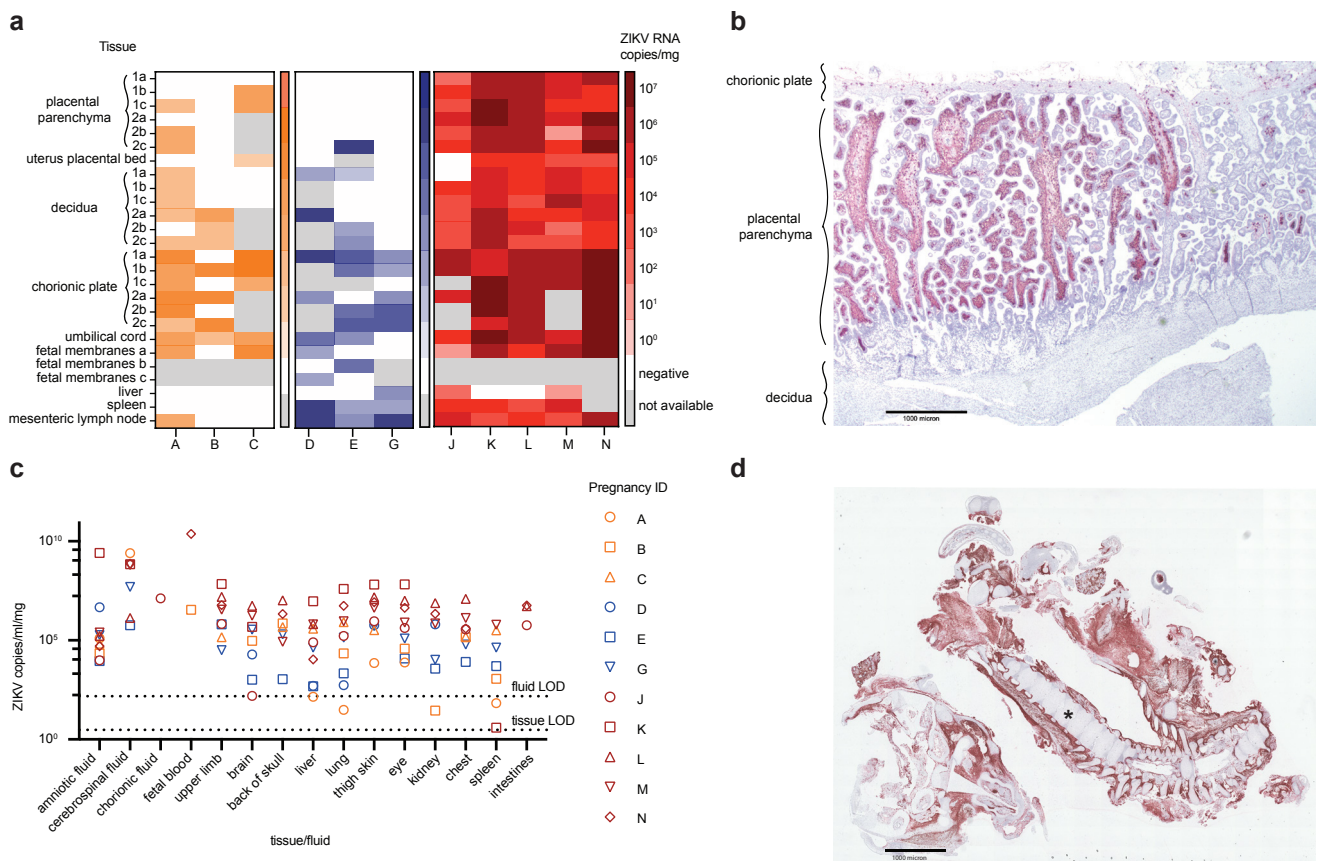

126  
 127 **Fig 2: ZIKV was detected in tissues from the maternal-fetal interface (MFI), dam, and fetus/embryo in all cases of**  
 128 **early pregnancy loss.** Cohort I (SIV+/ZIKV+ +ART) animals are in orange, Cohort II (SIV-/ZIKV+ +ART) animals are in blue,  
 129 and Cohort III (SIV-/ZIKV+) animals are in red. (a) ZIKV was detected in MFI and maternal tissues from Cohorts I-III by ZIKV-  
 130 specific RT-qPCR. (b) Representative image of ZIKV RNA (red staining) detected by in-situ hybridization (ISH) in the first  
 131 placental disc from a case of pregnancy loss (Pregnancy K). Here, there was marked diffuse villous parenchymal staining  
 132 extending from the basal plate to the chorionic trophoblastic shell with transmural segmental sparing of villi. (c) ZIKV was  
 133 detected in fetal/embryonic tissues from cases of early pregnancy loss by ZIKV-specific RT-qPCR. LOD denotes the limit of  
 134 detection. (d) Representative image of ZIKV RNA (red staining) distribution in an embryo from a case of early pregnancy loss  
 135 (Pregnancy N). Here, ZIKV RNA was detected in the periosteum and musculature of the head and body tissues. The asterisk  
 136 denotes the vertebral column of the embryo.

137 With frequent pregnancy loss across all ZIKV+ cohorts (Cohort I-III), we were not powered to  
 138 detect a difference in pregnancy loss rates in the presence versus absence of SIV coinfection;



139 therefore, we ceased enrollment of animals into our SIV+ Cohorts (I and IV). However, this  
140 unexpected finding is arguably more important: we serendipitously developed a model that  
141 results in frequent (78%) pregnancy loss in macaques and identified a potentially unappreciat-  
142 ed risk for early pregnancy loss in women infected with African-lineage ZIKV.

143 Previously, macaque infection with the same dose of ZIKV at GD 45 did not result in pregnan-  
144 cy loss<sup>27</sup>. The frequent first-trimester demise that we observe with our GD 30 infection mod-  
145 el may be influenced by placental development at the time of infection. ZIKV may be more  
146 likely to enter the fetal compartment earlier in gestation due to the remodeling of the spiral  
147 arteries<sup>29</sup>. In the first weeks of gestation, fetal extravillous cytotrophoblasts infiltrate maternal  
148 decidual spiral arteries, increasing uterine artery blood flow to the placenta<sup>30</sup>. Infection during  
149 this critical period may allow more virus access into the fetal compartment and increase the  
150 risk of demise. This hypothesis is supported by our earliest ZIKV exposure (Pregnancy K) that  
151 occurred at GD 26 and resulted in pregnancy loss earliest (12 DPI). The affected embryo also  
152 had the three highest tissue viremia of any pregnancy loss (Fig. 2C).

153 CZS is a complex phenotype that is likely to be influenced by many factors. In addition to  
154 timing of maternal infection, we propose that the difference in pregnancy outcomes noted in  
155 different regions of the world may be due to African-lineage ZIKV being more pathogenic than  
156 the Asian-lineage viruses that impacted the Americas. Previous studies in mice also suggest a  
157 similar conclusion: that African-lineage ZIKV could more easily go unnoticed by public health  
158 due to a tendency to cause fetal loss rather than birth defects<sup>24,25</sup>. Translating our pregnancy  
159 loss rate of 78% in macaques to humans, it is possible that CZS and microcephaly have gone  
160 unreported in Africa because ZIKV infections frequently result in miscarriage, possibly before  
161 the pregnancy is recognized. Our study in macaques is impactful because the similarities to  
162 humans in placental development and immunology make this model particularly translational.

163 Further studies focusing on mechanisms of the fetal demise phenotype are needed to fully  
164 understand the adverse pregnancy outcomes we observed and develop effective counter-  
165 measures. There is also the possibility that the ZIKV isolate used in this study is not broadly  
166 representative of viruses currently circulating throughout sub-Saharan Africa, however, there  
167 are more contemporary, geographically representative ZIKV isolates available from reference  
168 centers to perform comparative analyses<sup>24</sup>. Additionally, a sustained surveillance effort in  
169 African populations will be important to understand if African ZIKV is a looming threat for global health.

170 There are currently no FDA-approved countermeasures for ZIKV infection (<https://www.fda.gov/emergency-preparedness-and-response/mcm-issues/zika-virus-response-updates-fda>),  
171 in part due to waning ZIKV outbreaks and the absence of a translational pregnancy model  
172 that results in consistent outcomes to assess medical countermeasures. Consistent outcomes  
173 are needed to make robust comparisons in macaque studies that are inherently limited by  
174 small sample sizes. The first-trimester African-lineage ZIKV exposure model described here  
175 provides new opportunities for testing therapeutics.

## 177 **Online Methods**

### 178 Care and use of macaques

179 The macaques used in this study were cared for by the staff at the Wisconsin National  
180 Primate Research Center (WNPRC) in accordance with recommendations of the Weatherall  
181 report and the principles described in the National Research Council's Guide for the Care

182 and Use of Laboratory Animals<sup>31</sup>. The University of Wisconsin - Madison, College of Letters  
183 and Science and Vice Chancellor for Research and Graduate Education Centers Institutional  
184 Animal Care and Use Committee approved the nonhuman primate research under protocol  
185 number G006139. The University of Wisconsin - Madison Institutional Biosafety Committee  
186 approved this work under protocol number B00000117. Animals were housed in enclosures  
187 with the required floor space and fed using a nutritional plan based on recommendations pub-  
188 lished by the National Research Council. Animals were fed an extruded dry diet with adequate  
189 carbohydrates, energy, fat, fiber, mineral, protein, and vitamin content. Diets were supple-  
190 mented with fruits, vegetables, and other edible objects (e.g., nuts, cereals, seed mixtures,  
191 yogurt, peanut butter, popcorn, marshmallows, etc.) to provide variety and to inspire spe-  
192 cies-specific behaviors such as foraging. To promote psychological well-being, animals were  
193 provided with food enrichment, structural enrichment, and/or manipulanda. Environmental  
194 enrichment objects were selected to minimize the chances of pathogen transmission from  
195 one animal to another and from animals to care staff. While on the study, all animals were  
196 evaluated by trained animal care staff at least twice daily for signs of pain, distress, and illness  
197 by observing appetite, stool quality, activity level, and physical condition. Animals exhibiting  
198 abnormal presentation for any of these clinical parameters were provided appropriate care  
199 by attending veterinarians. Before all minor/brief experimental procedures, macaques were  
200 sedated using ketamine anesthesia and regularly monitored until fully recovered.

## 201 Study design

202 Twenty-three female rhesus macaques (*Macaca mulatta*) were divided into five cohorts denot-  
203 ed Cohort I through Cohort V (Table 2). Cohorts I (SIV+/ZIKV+ +ART), II (SIV-/ZIKV+ +ART), IV  
204 (SIV+/ZIKV- +ART), and V (SIV-/ZIKV- +ART) were exposed to 300 TCID<sub>50</sub> SIV-mac239 (SIV+)  
205 or mock (SIV-) with 1xPBS intrarectally (IR). The dam from Pregnancy O (Cohort IV) was not  
206 successfully infected with SIV. Thus, this animal was re-exposed to 500TCID<sub>50</sub> SIV-mac239 in-  
207 travenously 21 days after IR exposure. These four cohorts were treated once daily with inject-  
208 able combination ART (+ART) consisting of tenofovir disoproxil fumarate (TDF), emtricitabine  
209 (FTC), and dolutegravir sodium (DTG) (see **Antiretroviral therapy**). Once treated SIV+ animals  
210 controlled viremia under the limit of quantification of our in-house SIV RT-qPCR assay (<200  
211 copies/ml plasma, see **Viral RNA quantification by RT-qPCR**), animals had their combina-  
212 tion ART switched to an injectable combination of ART of TDF and FTC with two oral doses of  
213 Raltegravir (RAL, 100mg/dose) for 30 days before and throughout breeding (see **Antiretroviral**  
214 **therapy**). All five cohorts underwent timed breeding until pregnancy was confirmed by ul-  
215 trasound. Animals maintained combination ART (TDF/FTC/RAL) throughout pregnancy. At  
216 approximately GD 30, animals in Cohorts I, II, and III, were subcutaneously (SC) exposed to  
217 1x10<sup>4</sup> plaque forming units (PFU)/ml of African-lineage ZIKV (ZIKV+), while Cohorts IV and V  
218 were SC exposed to 1xPBS (ZIKV-). Animals were enrolled in Cohort III (ZIKV+ -ART) to con-  
219 firm that adverse pregnancy outcomes in Cohort I (SIV+/ZIKV+ +ART) and Cohort II (SIV-/  
220 ZIKV+ +ART) were the result of ZIKV exposure and not additive impact from ART treatment.  
221 All pregnancies were monitored throughout the study with weekly ultrasounds and plasma  
222 vRNA load quantification of ZIKV and SIV where appropriate. Pregnancies were allowed to go  
223 to term and natural delivery; however, a C-section was performed in the event of an overdue  
224 pregnancy (GD 175) (Pregnancies F, O, Q and W) or demise (no detection of fetal/embryonic  
225 heartbeat). In cases of demise, the C-section was followed by a fetal or embryonic necropsy,  
226 maternal biopsies, and MFI tissue collection.

## 227 Antiretroviral therapy

228 Animals in Cohorts I, II, IV, and V were treated daily with an injectable combination ART of  
229 sterile-filtered TDF (final concentration 5.1mg/ml), FTC (final concentration 50mg/ml), and  
230 DTG (final concentration 2.5mg/ml) in the commercially-available solubility vehicle Kleptose  
231 (Roquette, Gurnee, IL). ART drugs were sourced from Hangzhou APiChem Technology Co.,  
232 Ltd. (Hangzhou, Zhejiang, China) and were confirmed by mass-spectrophotometry at the  
233 University of Wisconsin-Madison Genetics and Biotechnology Center. This combination of  
234 ART drugs, which includes two nucleoside reverse transcriptase inhibitors (TDF and FTC) and  
235 an integrase inhibitor (DTG), has been previously shown to control SIV infection in macaques  
236 when provided as a combination injectable at a dose of 1ml/kg<sup>32,33</sup>. Beginning 30 days before  
237 breeding and then continuing throughout pregnancy, animals were given oral doses of ralte-  
238 gravir (RAL, 100mg/dose) twice daily alongside a modified daily injection containing TDF and  
239 FTC (5.1mg/ml and 50mg/ml, respectively). The integrase inhibitor RAL was used in place of  
240 DTG at this study stage due to the potential association of DTG with neural tube defects in  
241 human infants when used during pregnancy<sup>34</sup>. Following birth, animals transitioned from oral  
242 RAL/double-combination injectable back to triple-combination injectable for continued main-  
243 tenance of SIV infections. Mock-SIV animals stopped ART after the births of their infants.

## 244 Ultrasonography and fetal monitoring

245 Ultrasounds and fetal doppler were conducted weekly (Cohorts I, II, IV, and V) to observe the  
246 growth and viability of the fetus and to obtain measurements including fetal femur length (FL),  
247 biparietal diameter (BPD), head circumference (HC), and heart rate as previously described  
248 <sup>12,35</sup>. Mean growth measurements were plotted against mean measurements and standard  
249 deviations from specific gestational days collected from rhesus macaques<sup>36</sup>. Comparison of  
250 experimental growth parameters with the established growth curves allowed extrapolation  
251 of actual gestational age versus predicted gestational age<sup>12</sup>. The standard growth curve was  
252 extrapolated to contextualize measurements collected before GD 50. For Cohort III, fetal dop-  
253 plers were performed more frequently (daily from 10-21 days post-ZIKV infection) to confirm  
254 viability.

## 255 ZIKV Infection

256 Zika virus strain Zika virus/A.africanus-tc/Senegal/1984/DAKAR 41524 (ZIKV-DAK; GenBank:  
257 KX601166, SRR7879856) was originally isolated from *Aedes luteocephalus* mosquitoes in  
258 Senegal in 1984. One round of amplification on *Aedes pseudocutellaris* cells, followed by  
259 amplification on C6/36 cells, followed by two rounds of amplification on Vero cells, was per-  
260 formed by BEI Resources (Manassas, VA) to create the stock <sup>25</sup>. Once obtained, an additional  
261 expansion was performed on C6/36 cells. Stocks used to infect the animals were prepared  
262 from three different passages and sequencing showed the stock viruses to be identical at  
263 the consensus levels. No minor variants were present at >10% in any of the stocks. For virus  
264 challenges, ZIKV-DAK stock was diluted to 1x10<sup>4</sup> PFU in 1ml of 1x phosphate buffered saline  
265 (1x PBS) and delivered to each dam SC over the cranial dorsum via a 1ml luer lock syringe.

## 266 SIV Infection

267 Simian immunodeficiency virus (SIV-mac239, Genbank: [M33262](#)) stock was produced from  
268 two plasmids acquired from the AIDS Reagent Resource. Plasmids were ligated and trans-  
269 fected in E6 Vero cells. Cell-derived supernatant was then used to infect cultured macaque  
270 CD8+ peripheral blood mononuclear cells (PBMC), which were then monitored for virus pro-

271 duction. The supernatant was harvested at peak virus production. SIV-mac239 was initially  
272 used to intra-rectally (IR) expose all animals in Cohorts I and IV (A, B, C, P/Q, and O) at a dose  
273 of 300 TCID<sub>50</sub>. Following initial IR exposure, Animal O was found to be uninfected and was  
274 subsequently re-exposed intravenously with 500 TCID<sub>50</sub> with the same virus stock 21 days  
275 later. All virus stock dilutions were made in sterile-filtered 1x PBS and administered in a 1ml  
276 syringe.

### 277 Blood and body fluids monitoring

278 Blood samples were collected for isolation of plasma and PBMC from dams prior to SIV  
279 infection on days -1 and 0, post-SIV infection on days 7, 13, 14, 16, weekly through 4 weeks  
280 post-infection, and twice weekly until ZIKV infection. Blood samples, urine, and saliva were  
281 collected on days -1, 0, 3-7, 10, 14 post-ZIKV challenge, and then twice weekly until 28 DPI  
282 or until ZIKV was undetectable in blood plasma by RT-qPCR. Samples were then collected  
283 weekly until birth.

### 284 Viral RNA isolation from plasma, urine, and saliva

285 Plasma and PBMC were isolated from EDTA-treated whole blood by layering blood on top of  
286 ficoll in a 1:1 ratio and performing centrifugation at 1860x rcf for 30 minutes with no brake.  
287 Plasma and PBMC were extracted and transferred into separate sterile tubes. R10 medium  
288 warmed at 37 degrees Celsius was added to PBMC before a second centrifugation of both  
289 tubes at 670 x rcf for 8 minutes. Before treatment, media was removed from PBMC with 1x  
290 Ammonium-Chloride-Potassium (ACK) lysing buffer for 5 minutes to remove red blood cells.  
291 An equal amount of R10 medium was added to quench the reaction before another centrifuga-  
292 tion at 670 x rcf for 8 minutes. Supernatant was removed before freezing down of cells in  
293 CryoStor CS10 medium (BioLife Solutions, Inc., Bothell, WA) for long-term storage in liquid  
294 nitrogen freezers. Serum was obtained from clot activator tubes by centrifugation at 670 x rcf  
295 for 8 minutes or from serum separation tubes (SST) at 1400 x rcf for 15 minutes. Urine was  
296 passively collected from the bottom of animals' housing, centrifuged for 5 minutes at 500 x rcf  
297 to pellet debris, and 270ul was added into 30ul dimethyl sulfoxide (DMSO) followed by slow  
298 freezing. Saliva swabs were obtained and put into 500ul viral transport media (VTM) consist-  
299 ing of tissue culture medium 199 supplemented with 0.5% FBS and 1% antibiotic/antimy-  
300 cotic. Tubes with swabs were vortexed and centrifuged at 500 x rcf for 5 minutes. Viral RNA  
301 (vRNA) was extracted from 300uL plasma, 300uL saliva+VTM, or 300ul urine+DMSO using  
302 the Maxwell RSC Viral Total Nucleic Acid Purification Kit on the Maxwell 48 RSC instrument  
303 (Promega, Madison, WI).

### 304 Maternal, fetal, and maternal-fetal interface tissue (MFI) collection from first- 305 trimester pregnancy losses

306 Following early pregnancy loss, fetal, maternal, and MFI tissues were harvested by board  
307 certified veterinary pathologists at the WNPRC. Recovered MFI tissues for pathological eval-  
308 uation included three sections from each placental disc, amniotic/chorionic membrane from  
309 each placental disc, decidua from each placental disc, and one section from the decidua  
310 parietalis (fetal membranes), umbilical cord, and uterus/placental bed. One section of each  
311 of the following maternal or fetal tissues was also collected: maternal liver, maternal spleen,  
312 mesenteric lymph node (LN), fetal liver, fetal intestine, fetal lung, fetal kidney, fetal brain, fetal  
313 skin/muscle from thigh, fetal eye, fetal spleen, fetal upper limb, fetal chest, and fetal skull with  
314 brain. Two samples from each tissue section were collected and stored in either 750ul VTM or  
315 1mL RNAlater for vRNA assessment and future analysis. Tissues in VTM were frozen immedi-



316 ately after collection and stored at -80°C. Tissues in RNAlater were refrigerated for 24 hours  
317 at 4°C, after which RNAlater was aspirated off, and the tissues were stored at -80°C prior to  
318 vRNA isolation.

### 319 SIV RNA quantification by RT-qPCR

320 Viral RNA was quantified using an RT-qPCR assay based on the one developed by Cline  
321 et al.<sup>37</sup>. RNA was reverse transcribed and amplified using the TaqMan Fast Virus 1-Step  
322 Master Mix RT-qPCR kit (Invitrogen) on the LightCycler 480 instrument (Roche, Indianapolis,  
323 IN), and quantified by interpolation onto a standard curve made up of serial ten-fold di-  
324 lutions of in vitro transcribed RNA. RNA for this standard curve was transcribed from the  
325 p239gag\_Lifson plasmid kindly provided by Dr. Jeffrey Lifson, NCI/Leidos. The final re-  
326 action mixtures contained 150 ng random primers (Promega, Madison, WI), 600 nM each  
327 primer, and 100 nM probe. Primer and probe sequences are as follows: forward primer:  
328 5'-GTCTGCGTCATPTGGTGCATTC-3,

329 reverse primer:5'-CACTAGKTGTCTCTGCACTATPTGTTTTG-3' and

330 probe:5'-6-carboxyfluorescein-CTTCPTCAGTKTGTTTCACTTTCTTTCTGCG-BHQ1-3'.

331 The reactions cycled with the following conditions: 50°C for 5 minutes, 95°C for 20 seconds  
332 followed by 50 cycles of 95°C for 15 seconds and 62°C for 1 min. The limit of detection of this  
333 assay is 200 copies/ml.

### 334 ZIKV RNA isolation from tissue samples

335 Isolation of RNA from tissue samples was performed using a modification of the method de-  
336 scribed by Hansen, et al.<sup>38</sup>. Up to 200mg of tissue was disrupted in TRIzol Reagent (Thermo  
337 Fisher Scientific, Waltham, MA) with stainless steel beads (2x5 mm) using a TissueLyser  
338 (Qiagen, Germantown, MD) for three minutes at 25 r/s twice. Following homogenization, sam-  
339 ples in TRIzol were separated using bromo-chloro-propane (Sigma, St. Louis, MO). The aque-  
340 ous phase was collected into a new tube and glycogen was added as a carrier. The samples  
341 were washed in isopropanol and ethanol-precipitated overnight at -20°C. RNA was then fully  
342 re-suspended in 5 mM Tris pH 8.0.

### 343 ZIKV RNA quantification by RT-qPCR

344 Viral RNA was quantified using a highly sensitive RT-qPCR assay based on the one devel-  
345 oped by Lanciotti et al.<sup>39</sup>, though the primers were modified to accommodate both Asian and  
346 African lineage ZIKV lineages. RNA was reverse transcribed and amplified using the TaqMan  
347 Fast Virus 1-Step Master Mix RT-qPCR kit (Invitrogen) on a LightCycler 480 or LC96 instru-  
348 ment (Roche, Indianapolis, IN), and quantified by interpolation onto a standard curve made up  
349 of serial tenfold dilutions of in-vitro transcribed RNA. RNA for this standard curve was tran-  
350 scribed from a plasmid containing an 800 base pair region of the ZIKV genome targeted by  
351 the RT-qPCR assay. The final reaction mixtures contained 150 ng random primers (Promega,  
352 Madison, WI), 600 nM each primer and 100 nM probe. Primer and probe sequences are as  
353 follows:

354 forward primer: 5'-CGYTGCCCAACACAAGG-3'

355 reverse primer: 5'-CCACYAAYGTTCTTTTGCABACAT-3'

356 and probe: 5'-6-carboxyfluorescein-AGCCTACCTTGAYAAGCARTCAGACACYCAA-BHQ1-3'.

357 The reactions cycled with the following conditions: 50°C for 5 minutes, 95°C for 20 seconds  
358 followed by 50 cycles of 95°C for 15 seconds, and 60°C for 1 min. The limit of detection of  
359 this assay in body fluids is 150 copies/ml and 3 copies/mg in tissues.

### 360 IgM ELISA

361 An IgM ELISA was performed on serum samples collected on days 0, 7, 13, and 21 following  
362 ZIKV infection. Samples were run in triplicate using the AbCam anti-Zika virus IgM micro-cap-  
363 ture ELISA kit protocol according to the manufacturer's instructions (cat# ab213327, Abcam  
364 Inc., Cambridge, UK). Briefly, samples were thawed to room temperature, added to an an-  
365 ti-human IgM-coated microplate tray ( $\mu$  capture), and incubated. Zika virus conjugate+HRP  
366 was added, followed by TMB substrate solution (3, 3', 5, 5'-tetramethylbenzidine < 0.1%),  
367 and stop solution (sulphuric acid, 0.2 mol/L). The plate absorbance was read at dual wave-  
368 lengths of 450nm and 600nm within 30 minutes of adding the stop solution, and the IgM con-  
369 centration was measured in the calculated Abcam units (AU) relative to the kit cut-off control.  
370 To calculate the AU, the 600nm well data were first subtracted from the 450nm well data.  
371 Because multiple samples were run for each animal at each DPI, the average of the numbers  
372 was calculated, multiplied by ten, and divided by the absorbance of the cut-off control to get  
373 a single AU value per sample. Samples were considered positive if they were above 10 AU  
374 and negative if they were below 10 AU.

### 375 Plaque Reduction Neutralization Test

376 Titers of ZIKV neutralizing antibodies (nAb) were determined for days 0, 21, or 28 post-ZIKV  
377 infection using PRNT on Vero cells (ATCC #CCL-81) with a cutoff value of 90% (PRNT<sub>90</sub>)<sup>40</sup>.  
378 Briefly, ZIKV-DAK was mixed with serial 2-fold dilutions of serum for 1 hour at 37°C prior to  
379 being added to Vero cells. Neutralization curves were generated in GraphPad Prism (San  
380 Diego, CA) and the resulting data were analyzed by nonlinear regression to estimate the log<sub>10</sub>  
381 reciprocal serum dilution required to inhibit 90% infection of Vero cell culture<sup>40,41</sup>.

### 382 In situ hybridization (ISH)

383 ISH probes against the ZIKV genome were commercially purchased (cat# 468361, Advanced  
384 Cell Diagnostics, Newark, CA). ISH was performed using the RNAscope® Red 2.5 kit (cat#  
385 322350, Advanced Cell Diagnostics, Newark, CA) according to the manufacturer's protocol.  
386 After deparaffinization with xylene, a series of ethanol washes, and peroxidase blocking, sec-  
387 tions were heated with the antigen retrieval buffer and then digested by proteinase. Sections  
388 were then exposed to the ISH target probe and incubated at 40°C in a hybridization oven for  
389 two-hours. After rinsing, the ISH signal was amplified using the provided pre-amplifier fol-  
390 lowed by the amplifier-containing labeled probe binding sites, and developed with a Fast Red  
391 chromogenic substrate for 10 minutes at room temperature. Sections were then stained with  
392 hematoxylin, air-dried, and mounted.

### 393 Statistical analyses

394 We defined peak plasma viremia as the highest ZIKV plasma viremia detected for each dam  
395 in Cohorts I-III. Plasma viremia duration was defined for these animals as the last time point  
396 a dam had ZIKV detected in plasma by RT-qPCR above the limit of quantification of the as-  
397 say. Overall plasma ZIKV RNA loads were calculated for all ZIKV-infected dams (Cohorts I-III)  
398 using the trapezoidal method to calculate AUC in R Studio v. 1.4.1717. AUC values were then  
399 compared between Cohorts I-III using a Kruskal-Wallis rank sum test. Peak plasma ZIKV RNA  
400 loads, as well as the duration of positive ZIKV RNA detection, were also compared between

401 Cohorts I-III using a Kruskal-Wallis rank sum test (duration) and one-way ANOVA (peak plas-  
402 ma viremia) using R Studio v. 1.4.1717. The time to peak plasma ZIKV RNA load was also  
403 compared between dams in Cohorts I-III. Time to peak was analyzed using a one-way ANOVA  
404 to compare between Cohorts. For all analyses of plasma ZIKV RNA loads,  $p < 0.05$  was used  
405 to define statistical significance. In-utero growth trajectories of abdominal circumference (AC),  
406 biparietal diameter (BPD), femur length (FL), and head circumference (HC) were quantified  
407 by fitting a linear mixed-effects regression model with animal-specific random effects and an  
408 autoregressive correlation structure over time, in this case, weeks post-infection (WPI) using  
409 SAS version 9.4 (SAS Institute, Cary NC). Since the growth trajectories were non-linear, a log  
410 transformation for each outcome was used. Growth trajectories were compared between  
411 Cohorts I, IV and V by comparing the corresponding slopes (Supplementary Table 3) and  
412 graphs were generated using R software v. 4.1.0 (R Foundation for Statistical Computing)  
413 (Supplementary Fig. 2). No statistical analyses of infant development, vision, and hearing tests  
414 were performed due to small group sizes.

### 415 Infant developmental tests

416 The Schneider Neonatal Assessment for Primates (SNAP) was used to assess the neurodevel-  
417 opmental areas of interest (Orientation, Motor maturity and activity, Sensory responsiveness,  
418 and State control). This neonatal test is well validated and has previously been used to define  
419 neonatal development of prenatally ZIKV-exposed infants<sup>16</sup>. The Catwalk XT version 10.6 was  
420 modified for infant rhesus macaques and used to assess gait development, as described  
421 previously<sup>26,42</sup>. The SNAP was administered at 7, 14, 21, and 28 (+/- 2) days of life, and the  
422 Catwalk was administered on 14, 21, and 28 days of life.

### 423 Infant vision and hearing tests

424 Infants were anesthetized for eye exams performed by a human ophthalmologist with retinal  
425 fellowship training (M. Nork). Slit-lamp biomicroscopy and indirect ophthalmoscopy were  
426 performed after pupillary dilation. To evaluate visual function, standard visual electrodiagnos-  
427 tic procedures including a full-field electroretinogram (ERG) and the cortical-derived visual  
428 evoked potential (VEP) were performed as previously described<sup>13</sup>. To define retinal layer struc-  
429 ture, spectral-domain optical coherence tomography (OCT) was performed as previously de-  
430 scribed<sup>13</sup>. Auditory brainstem response (ABR) testing was completed, which measures brain-  
431 stem evoked potentials generated by a brief click, 500 Hz stimulus, or 1000 Hz stimulus, as  
432 previously described. The presence or absence of a Wave IV response was recorded for each  
433 decibel level and stimulus<sup>13</sup>. The presence or absence of a Wave IV response was recorded  
434 for each decibel level and stimulus.

## 435 **Data Availability**

436 All relevant data are within the manuscript and the Supplementary Information files. Primary  
437 data that support this study are also available at GitHub [https://github.com/Iraasch/Frequent-](https://github.com/Iraasch/Frequent-first-trimester-pregnancy-loss-in-rhesus-macaques-infected-with-African-lineage-Zika-virus)  
438 [first-trimester-pregnancy-loss-in-rhesus-macaques-infected-with-African-lineage-Zika-virus](https://github.com/Iraasch/Frequent-first-trimester-pregnancy-loss-in-rhesus-macaques-infected-with-African-lineage-Zika-virus).  
439 ISH images are available at <https://go.wisc.edu/23d838>.

## 440 **Acknowledgments**

441 This work was supported by NIH Grants R01AI138647, P01AI132132, K08AAI33398,  
442 R01AAH9849, and P51OD011106. This work was supported in part by an Unrestricted Grant

443 from Research to Prevent Blindness, Inc. to the UW-Madison Department of Ophthalmology  
444 and Visual Sciences and in part by the Core Grant for Vision Research from the NIH to UW-  
445 Madison (P30 EY016665). Authors thank the McPherson Eye Research Institute at UW-  
446 Madison. Authors also thank Max C. Ertl, Mitchell D. Ramuta, and Ryan V. Moriarty for their  
447 thoughtful reading and discussion.

## 448 **Bibliography**

- 449 1. Dick, G. W. A., Kitchen, S. F. & Haddow, A. J. Zika virus. I. Isolations and serological  
450 specificity. *Trans. R. Soc. Trop. Med. Hyg.* **46**, 509–520 (1952).
- 451 2. de Oliveira, W. K. *et al.* Increase in Reported Prevalence of Microcephaly in Infants  
452 Born to Women Living in Areas with Confirmed Zika Virus Transmission During the First  
453 Trimester of Pregnancy — Brazil, 2015. *MMWR Surveill. Summ.* **65**, 242–247 (2016).
- 454 3. Teixeira, M. G., Costa, M. da C. N., de Oliveira, W. K., Nunes, M. L. & Rodrigues, L. C.  
455 The Epidemic of Zika Virus-Related Microcephaly in Brazil: Detection, Control, Etiology, and  
456 Future Scenarios. *Am. J. Public Health* **106**, 601–605 (2016).
- 457 4. Moore, C. A. *et al.* Characterizing the Pattern of Anomalies in Congenital Zika  
458 Syndrome for Pediatric Clinicians. *JAMA Pediatr.* **171**, 288–295 (2017).
- 459 5. Massetti, T. *et al.* Clinical characteristics of children with congenital Zika syndrome: a  
460 case series. *Arq. Neuropsiquiatr.* **78**, 403–411 (2020).
- 461 6. Roth, N. M. *et al.* Zika-Associated Birth Defects Reported in Pregnancies with  
462 Laboratory Evidence of Confirmed or Possible Zika Virus Infection - U.S. Zika Pregnancy  
463 and Infant Registry, December 1, 2015-March 31, 2018. *MMWR Morb. Mortal. Wkly. Rep.* **71**,  
464 73–79 (2022).
- 465 7. Yadav, P. D. *et al.* Zika a Vector Borne Disease Detected in Newer States of India  
466 Amidst the COVID-19 Pandemic. *Front. Microbiol.* **13**, 888195 (2022).
- 467 8. Giron, S. *et al.* Vector-borne transmission of Zika virus in Europe, southern France,  
468 August 2019. *Euro Surveill.* **24**, (2019).
- 469 9. Calvez, E. *et al.* First probable case of congenital Zika syndrome in Lao People's  
470 Democratic Republic. *Int. J. Infect. Dis.* **105**, 595–597 (2021).
- 471 10. Yakob, L. Zika Virus after the Public Health Emergency of International Concern Period,  
472 Brazil. *Emerg. Infect. Dis.* **28**, 837–840 (2022).
- 473 11. Magnani, D. M. *et al.* Fetal demise and failed antibody therapy during Zika virus infec-  
474 tion of pregnant macaques. *Nat. Commun.* **9**, 1624 (2018).
- 475 12. Mohr, E. L. *et al.* Ocular and uteroplacental pathology in a macaque pregnancy with  
476 congenital Zika virus infection. *PLoS One* **13**, e0190617 (2018).
- 477 13. Koenig, M. R. *et al.* Quantitative definition of neurobehavior, vision, hearing and brain  
478 volumes in macaques congenitally exposed to Zika virus. *PLoS One* **15**, e0235877 (2020).
- 479 14. Dudley, D. M. *et al.* Miscarriage and stillbirth following maternal Zika virus infection in  
480 nonhuman primates. *Nat. Med.* **24**, 1104–1107 (2018).



- 481 15. Moore, B. Comparison of structural brain imaging in infant macaques with prenatal  
482 Zika virus exposure in mid- and late-first trimester. (2021).
- 483 16. Ausderau, K. *et al.* Neonatal Development in Prenatally Zika Virus-Exposed Infant  
484 Macaques with Dengue Immunity. *Viruses* **13**, (2021).
- 485 17. Crooks, C. M. *et al.* Previous exposure to dengue virus is associated with increased  
486 Zika virus burden at the maternal-fetal interface in rhesus macaques. *PLoS Negl. Trop. Dis.*  
487 **15**, e0009641 (2021).
- 488 18. Aschengrau, A. *et al.* An International Prospective Cohort Study of HIV and Zika in  
489 Infants and Pregnancy (HIV ZIP): Study Protocol. *Front Glob Womens Health* **2**, 574327  
490 (2021).
- 491 19. Carter, A. M. Animal models of human placentation--a review. *Placenta* **28 Suppl A**,  
492 S41–7 (2007).
- 493 20. Wachtman, L. & Mansfield, K. Viral Diseases of Nonhuman Primates. *Nonhuman*  
494 *Primates in Biomedical Research* 1 (2012).
- 495 21. Weaver, S. C. *et al.* Zika virus: History, emergence, biology, and prospects for control.  
496 *Antiviral Res.* **130**, 69–80 (2016).
- 497 22. McCutchan, F. E. Global epidemiology of HIV. *J. Med. Virol.* **78 Suppl 1**, S7–S12 (2006).
- 498 23. Sherman, K. E. *et al.* Zika Virus Exposure in an HIV-Infected Cohort in Ghana. *J. Acquir.*  
499 *Immune Defic. Syndr.* **78**, e35–e38 (2018).
- 500 24. Aubry, F. *et al.* Recent African strains of Zika virus display higher transmissibility and  
501 fetal pathogenicity than Asian strains. *Nat. Commun.* **12**, 916 (2021).
- 502 25. Jaeger, A. S. *et al.* Zika viruses of African and Asian lineages cause fetal harm in a  
503 mouse model of vertical transmission. *PLoS Negl. Trop. Dis.* **13**, e0007343 (2019).
- 504 26. Raasch, L. E. *et al.* Fetal loss in pregnant rhesus macaques infected with high-dose  
505 African-lineage Zika virus. *bioRxiv* 2022.03.21.485088 (2022) doi:10.1101/2022.03.21.485088.
- 506 27. Crooks, C. M. *et al.* African-Lineage Zika Virus Replication Dynamics and Maternal-  
507 Fetal Interface Infection in Pregnant Rhesus Macaques. *J. Virol.* **95**, e0222020 (2021).
- 508 28. Barry, P. A. *et al.* Nonhuman primate models of intrauterine cytomegalovirus infection.  
509 *ILAR J.* **47**, 49–64 (2006).
- 510 29. Enders, A. C. & King, B. F. Early stages of trophoblastic invasion of the maternal vascu-  
511 lar system during implantation in the macaque and baboon. *Am. J. Anat.* **192**, 329–346 (1991).
- 512 30. Albrecht, E. D. & Pepe, G. J. Regulation of Uterine Spiral Artery Remodeling: a Review.  
513 *Reprod. Sci.* **27**, 1932–1942 (2020).
- 514 31. National Research Council, Division on Earth and Life Studies, Institute for Laboratory  
515 Animal Research & Committee for the Update of the Guide for the Care and Use of Laboratory  
516 Animals. *Guide for the Care and Use of Laboratory Animals: Eighth Edition.* (National  
517 Academies Press, 2011).

- 518 32. Del Prete, G. Q. *et al.* Short Communication: Comparative Evaluation of Coformulated  
519 Injectable Combination Antiretroviral Therapy Regimens in Simian Immunodeficiency Virus-  
520 Infected Rhesus Macaques. *AIDS Res. Hum. Retroviruses* **32**, 163–168 (2016).
- 521 33. Okoye, A. A. *et al.* Early antiretroviral therapy limits SIV reservoir establishment to delay  
522 or prevent post-treatment viral rebound. *Nat. Med.* **24**, 1430–1440 (2018).
- 523 34. Zash, R., Makhema, J. & Shapiro, R. L. Neural-Tube Defects with Dolutegravir  
524 Treatment from the Time of Conception. *N. Engl. J. Med.* **379**, 979–981 (2018).
- 525 35. Nguyen, S. M. *et al.* Highly efficient maternal-fetal Zika virus transmission in pregnant  
526 rhesus macaques. *PLoS Pathog.* **13**, e1006378 (2017).
- 527 36. Tarantal, A. F. Ultrasound Imaging in Rhesus (*Macaca mulatta*) and Long-tailed (*Macaca*  
528 *fascicularis*) Macaques: Reproductive and Research Applications. *The Laboratory Primate*  
529 317–352 Preprint at <https://doi.org/10.1016/b978-012080261-6/50020-9> (2005).
- 530 37. Cline, A. N., Bess, J. W., Piatak, M., Jr & Lifson, J. D. Highly sensitive SIV plasma viral  
531 load assay: practical considerations, realistic performance expectations, and application to  
532 reverse engineering of vaccines for AIDS. *J. Med. Primatol.* **34**, 303–312 (2005).
- 533 38. Hansen, S. G. *et al.* Immune clearance of highly pathogenic SIV infection. *Nature* **502**,  
534 100–104 (2013).
- 535 39. Lanciotti, R. S. *et al.* Genetic and serologic properties of Zika virus associated with an  
536 epidemic, Yap State, Micronesia, 2007. *Emerg. Infect. Dis.* **14**, 1232–1239 (2008).
- 537 40. Breitbach, M. E. *et al.* Primary infection with dengue or Zika virus does not affect  
538 the severity of heterologous secondary infection in macaques. *PLoS Pathog.* **15**, e1007766  
539 (2019).
- 540 41. Lindsey, H. S., Calisher, C. H. & Mathews, J. H. Serum dilution neutralization test for  
541 California group virus identification and serology. *J. Clin. Microbiol.* **4**, 503–510 (1976).
- 542 42. Kabakov, S. A. *et al.* Quantification of Early Gait Development: Expanding  
543 the Application of Catwalk Technology to an Infant Rhesus Macaque Model. *bioRxiv*  
544 2022.11.14.516450 (2022) doi:10.1101/2022.11.14.516450.
